# Supplementary material
Source: publisher figshare collection journal article supplement (https://acs.figshare.com/ndownloader/files/3828805)
Supplement: Supplementary file 1 [file 3828805]

Supplementary Information for: **Effect of Organic Solvents on Li<sup>+</sup> Ion Solvation and Transport in Ionic Liquid Electrolytes: A Molecular Dynamics Simulation Study.**

*Zhe Li,<sup>†</sup> Oleg Borodin,<sup>‡</sup> Grant D. Smith,<sup>§</sup> Dmitry Bedrov,<sup>†,\*</sup>*

<sup>†</sup> Department of Materials Science & Engineering, University of Utah, 122 S. Central Campus Dr., Rm 304, Salt Lake City, Utah, 84112, USA

<sup>‡</sup> Electrochemistry Branch, Army Research Laboratory, 2800 Powder Mill Rd., Adelphi, Maryland 20783, United States

<sup>§</sup> Wasatch Molecular Inc., 825 North, 300 West, Salt Lake City, Utah, 84103, USA

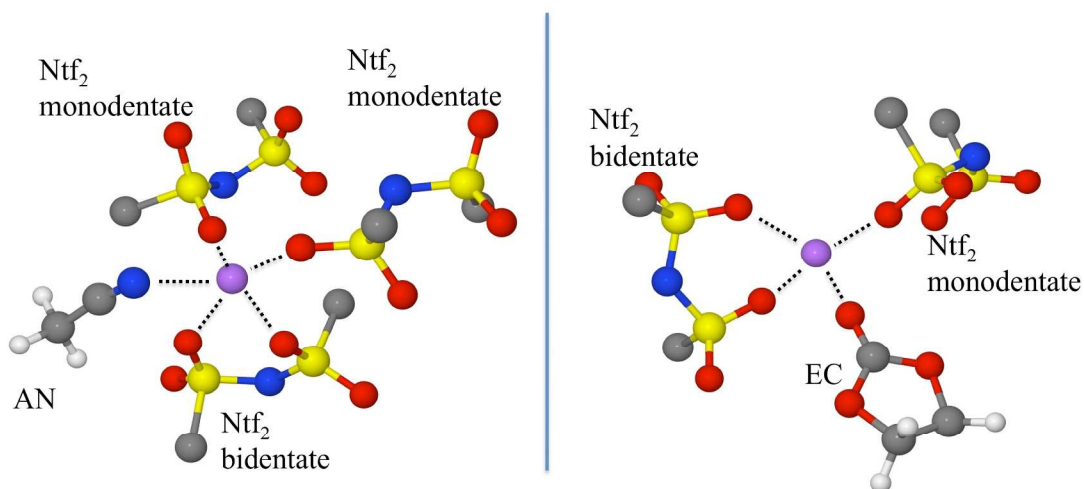

**Figure SI.1.** Representative snapshots of Li-ion first coordination shell in ILEs with 20% organic cosolvent. (Fluorine atoms are not shown).

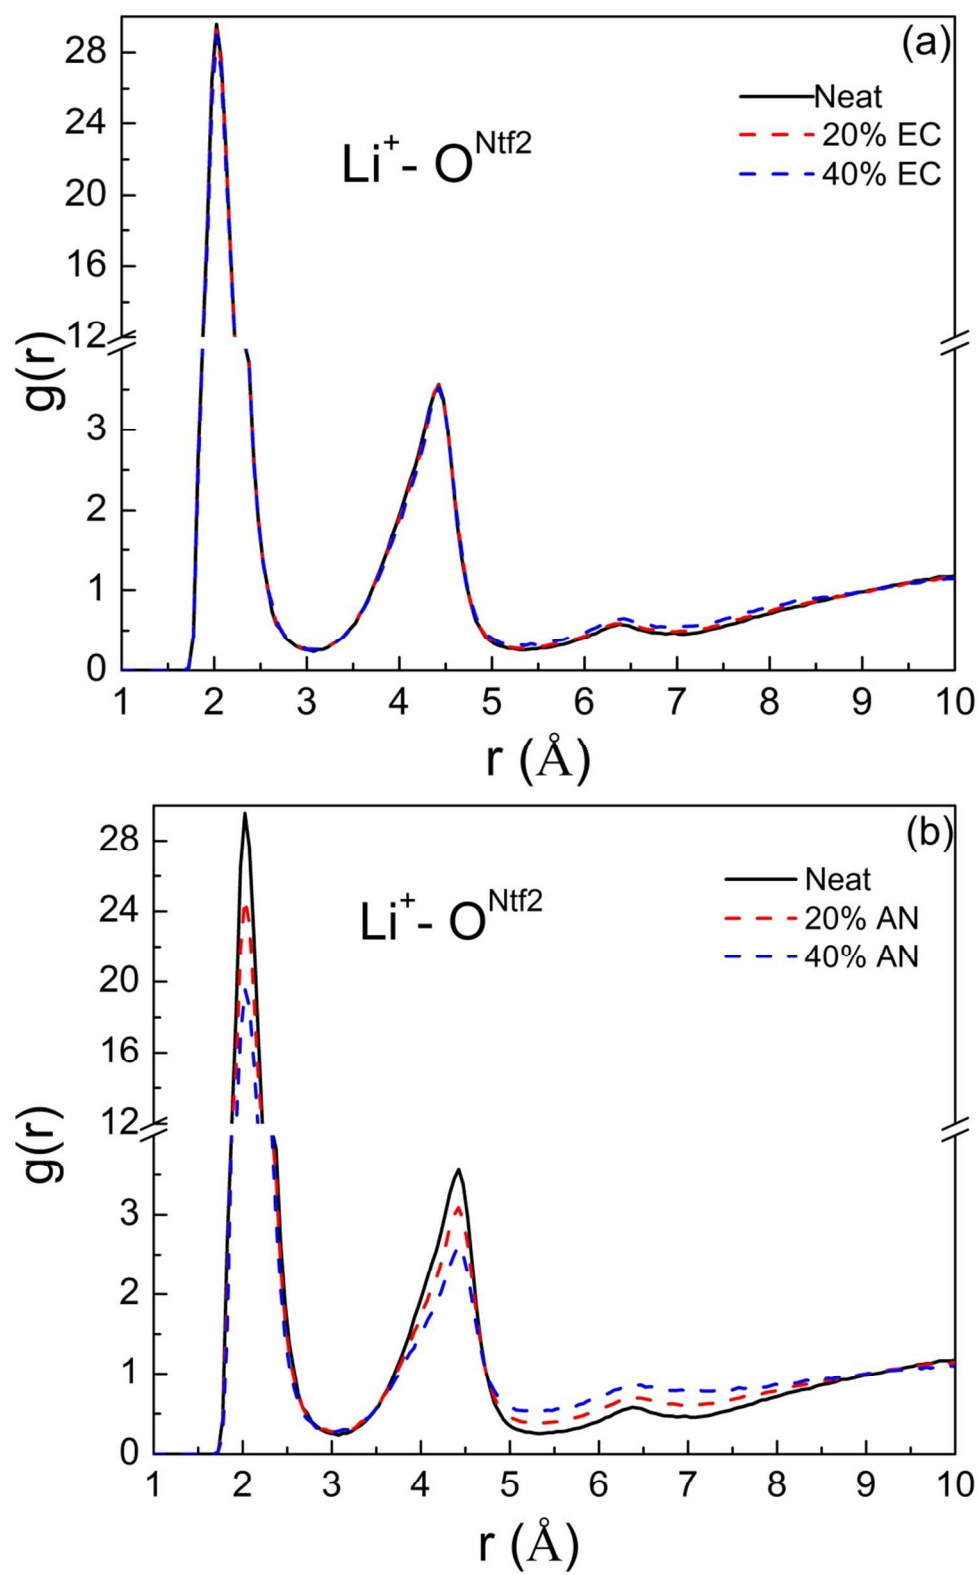

**Figure SI.2.** Radial distribution functions for  $\text{Li}^+ - \text{O}^{\text{Ntf2}}$  in ILEs with (a) EC and (b) AN at 363K.

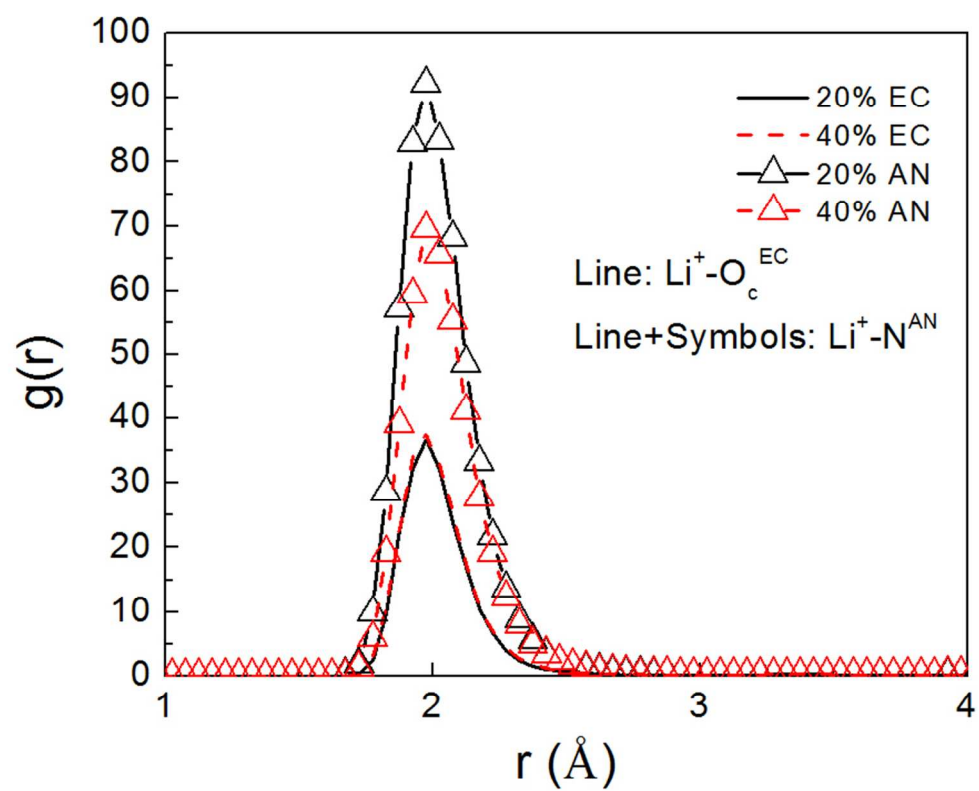

**Figure SI.3.** Radial distribution functions for  $\text{Li}^+ - \text{O}_c^{\text{EC}}$  and  $\text{Li}^+ - \text{N}^{\text{AN}}$  obtained from simulations of ILEs at 363K

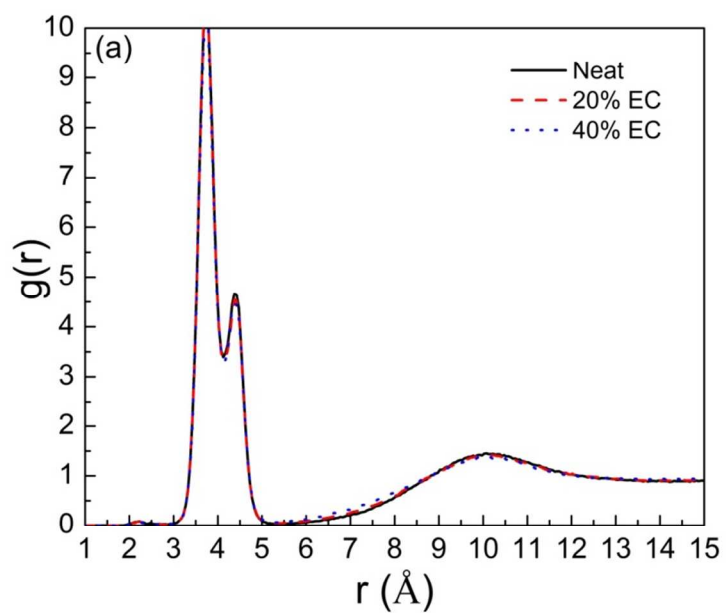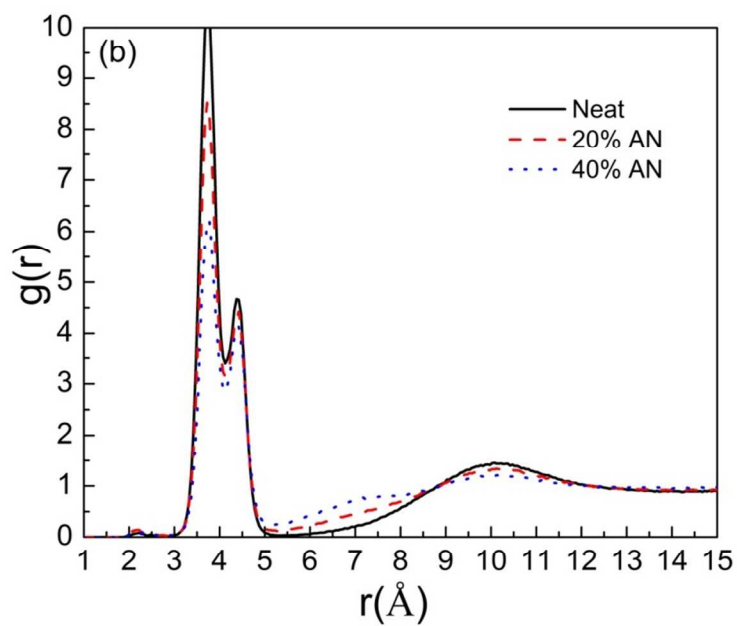

**Figure SI.4.** Radial distribution functions for  $\text{Li}^+-\text{N}^{\text{tft2}}$  obtained from simulations of ILE at 363K.

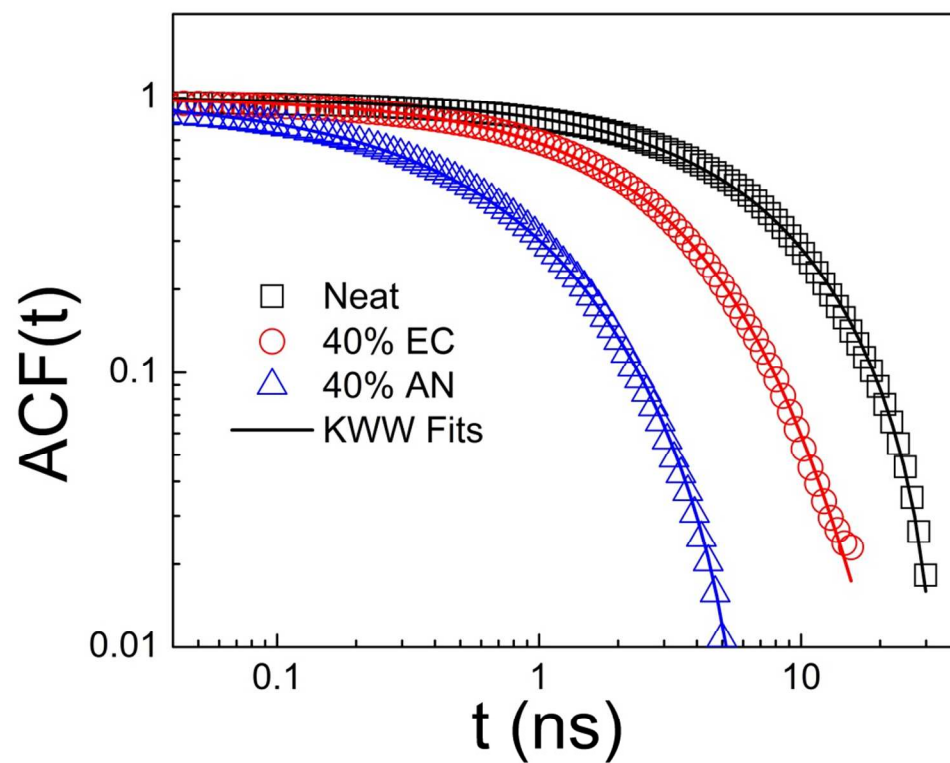

**Figure SI.5.** Evolution of  $\text{Li}^+ - \text{N}^{\text{Ntf2}}$  residence time auto correlation functions (ACF) and their KWW fits as obtained from MD simulations at 363K.
